# Supplementary material
Source: PubMed Central journal article supplement (PMC1761968)
Supplement: plntphys_pp.106.086306_1.pdf [file plntphys_pp.106.086306_1.pdf]

**Table SI.** Monthly average minimum, maximum and mean temperature and total precipitation for 2003 and 2004 growing season in Delhi and London, Ontario (Environment Canada, 2003-2004).

| Year | Month     | Temperature (°C) |      |      |       |       |       | Precipitation (mm) |       |
|------|-----------|------------------|------|------|-------|-------|-------|--------------------|-------|
|      |           | London           |      |      | Delhi |       |       | London             | Delhi |
|      |           | Min              | Max  | Mean | Min   | Max   | Mean  |                    |       |
| 2003 | June      | 11.9             | 17.5 | 23.2 | 12.1  | 18.0  | 23.8  | 64.6               | 81.2  |
|      | July      | 14.7             | 20.3 | 25.9 | 14.9e | 20.6  | 26.3e | 67.4               | 93.1  |
|      | August    | 14.9             | 20.8 | 26.6 | 15.1  | 21.0  | 26.9  | 55.0               | 44.0  |
|      | September | 10.3             | 16.0 | 21.6 | 10.9e | 16.2e | 21.5e | 85.8               | 131.2 |
|      | October   | 3.3              | 8.6  | 13.8 | 3.7e  | 8.7e  | 13.7e | 72.5               | 86.4  |
| 2004 | June      | 11.5             | 17.1 | 22.6 | 11.7  | 17.4  | 23.0  | 109.6              | 59.2  |
|      | July      | 15.0             | 20.0 | 25.0 | 15.2* | 20.6* | 25.9* | 72.2               | 74.5* |
|      | August    | 13.1             | 18.2 | 23.3 | 13.3  | 18.7  | 24.0  | 51.8               | 56.2  |
|      | September | 10.7             | 17.1 | 23.4 | 10.7  | 17.3e | 23.9e | 18.4               | 41.2  |
|      | October   | 5.6              | 10.5 | 15.3 | 6.0   | 10.7  | 15.3  | 42.8               | 70.8  |

\*, the value displayed is based on incomplete data; e, estimated.
